# Supplementary material
Source: Springer Nature journal article supplement (https://www.springermedizin.de/resource/supplementary/12911_2014_889_MOESM2_ESM.pdf/9526778)

**Doe, John B.**

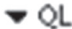

Designates formulary status  
(e.g. second tier)

2T Norpace CR

G

2T Norpramin

G

1T **nortrel 1/35 (28)**

(second tier, preferred)

2P **NoruASC**

2T Norvir

2T Norvir Soft Gelatin

(third tier, non-formulary)

3NF Notuss PD

2P **NovoLIN R**

Formulary: **ABC FORMULARY**

Caremark Mail Eligible: Yes

Back

Look Up: no

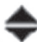

Supplement: MOESM2 [file 9526778]
